# Supplementary material for: Comparison of patient-led, fibromyalgia-orientated physical activity and a non-specific, standardised 6-month physical activity program on quality of life in individuals with fibromyalgia: a protocol for a randomised controlled trial
Source: Springer Nature journal article supplement (doi:10.1186/s13063-020-04730-3), 2020-09-17
Supplement: MOESM2 [file 18390460]

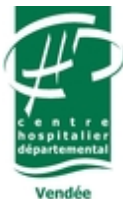

« Fibromyalgie et activité physique spécifique »

FibrAPSpé – Thomas Rulleau

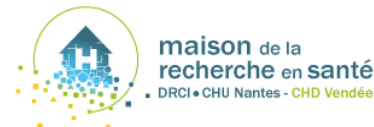

## CREATION DU PATIENT

Initiales **PATIENT**    **Nom** : 1ère lettre     **Prénom** : 1ère lettre

## PAGE DE GARDE

# « FibrAPSpé »

N° Centre :

N° Patient :

**PATIENT**    **Nom** : 1ère lettre

**Prénom** : 1ère lettre

**Date de recueil du consentement écrit:**

Date :  

### CRITERES D'INCLUSION

Tous les critères ci-dessous sont respectés : Oui/ Non

**⚠ Si la réponse est NON le patient n'est pas incluable.**

Si NON, merci de préciser :

|   |                                                                                                                                                                                                                                                           |          |
|---|-----------------------------------------------------------------------------------------------------------------------------------------------------------------------------------------------------------------------------------------------------------|----------|
| 1 | Patient(e) majeur                                                                                                                                                                                                                                         | Oui/ Non |
| 2 | Diagnostic de fibromyalgie (Häuser et al., 2017) :<br><br>4 < WPI < 6 et SSS ≥ 9<br><br><b>OU</b><br><br>WPI ≥ 6 et SSS ≥ 5<br><br><b>ET</b><br><br>une douleur présente <b>au minimum</b> dans 4 des 5 régions du corps (5 régions = 4 cadrans + l'axe). | Oui/ Non |
| 3 | Patient(e) dont la FIQ-R est ≤ 59/100                                                                                                                                                                                                                     | Oui/ Non |
| 4 | Patient(e) pouvant être suivi durant 12 mois au sein du CETD                                                                                                                                                                                              | Oui/ Non |
| 5 | Patient(e) pouvant suivre les activités physiques proposées par « Siel Bleu », sur le plan physique et organisationnel                                                                                                                                    | Oui/ Non |
| 6 | Patient(e) possédant un smartphone et/ou un ordinateur (mac/pc) avec une connexion internet permettant l'utilisation d'une application de suivi en lien avec le traqueur d'activité                                                                       | Oui/ Non |
| 7 | Patient(e) ayant les capacités de comprendre le protocole et ayant donné son consentement pour participer à l'étude                                                                                                                                       | Oui/ Non |
| 8 | Patient(e) bénéficiant d'une couverture sociale                                                                                                                                                                                                           | Oui/ Non |

### CRITERES DE NON-INCLUSION

Y'a-t-il présence d'un critère de non-inclusion : Oui/ Non

**⚠ Si la réponse est OUI le patient n'est pas incluable.**

Si OUI, merci de préciser :

|   |                                                                                                                                           |          |
|---|-------------------------------------------------------------------------------------------------------------------------------------------|----------|
| 1 | Patient(e) participant à un essai interventionnel dans les 3 mois précédents l'inclusion                                                  | Oui/ Non |
| 2 | Femme enceinte ou allaitante, ou ayant la possibilité de procréer sans moyen de contraception efficace                                    | Oui/ Non |
| 3 | Patient(e) mineur, sous tutelle, curatelle ou privé de liberté                                                                            | Oui/ Non |
| 4 | Patient(e) incapable de suivre le protocole, selon le jugement de l'investigateur, ou refusant l'utilisation des applications numériques, | Oui/ Non |
| 5 | Patient avec contre-indications à l'activité physique                                                                                     | Oui/ Non |
| 6 | Patient(e) ayant déjà suivi les activités physiques proposées par « Siel Bleu »                                                           | Oui/ Non |

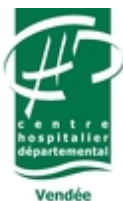

## Visite d'inclusion (J0)

Date: |\_|\_|/|\_|\_|/|\_|\_|\_|\_|

### RANDOMISATION

Cliquer sur « ACTION » situé en haut à gauche de l'écran puis cliquer sur « RANDOMISER »

Date de la randomisation : |\_|\_|/|\_|\_|/|\_|\_|\_|\_|

Bras de randomisation:

- Bras « Prise en charge classique non spécifique en groupe commun « multipathologique » »
- Bras « Prise en charge spécifique en coaching téléphonique « Patients fibromyalgiques » »

Pour toute randomisation non réalisée, merci de bien vouloir renseigner la raison dans la partie "Fin d'étude – Déviations au protocole".

### CARACTERISTIQUES DEMOGRAPHIQUES

Sexe : Homme/ Femme

Date de naissance (mois/ année): |\_|\_|/|\_|\_|\_|\_|

Statut marital: célibataire/ marié(e)/ veuf(ve)/ND

Antécédents traumatiques (*acte violent qui a provoqué une série de lésions et de troubles*) : Oui/ Non/ND

Si oui, précisez : mort soudaine et inattendue d'un proche/ témoin d'un décès/ témoin d'une agression/ / victime d'une agression/ victime d'un accident de la route/ victime d'un accident du travail/ autres

Si autres, précisez : .....

Date de diagnostic de la maladie : |\_|\_|/|\_|\_|/|\_|\_|\_|\_|

Activité professionnelle en cours: Oui/ Non/ND

Si oui, précisez : Agriculteurs exploitants/ Artisans, commerçants et chefs d'entreprise/ Cadres et professions intellectuelles supérieures/ Professions Intermédiaires/ Employés/ Ouvriers

Retraité : Oui/ Non/ ND

Arrêt de travail en cours: Oui/ Non/ ND

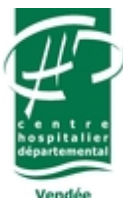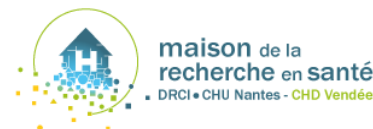

Si oui, date d'arrêt : |\_|\_|\_|/|\_|\_|\_|/|\_|\_|\_|\_|\_|

### CARACTERISTIQUES DEMOGRAPHIQUES (suite)

Activité physique en cours: Oui/ Non/ ND

Si oui, précisez :

|                                                                      |                            |              |          |
|----------------------------------------------------------------------|----------------------------|--------------|----------|
| Marche                                                               | Durée (en heures)/ semaine | Nb séances : | /semaine |
| Marche nordique                                                      | Durée (en heures)/ semaine | Nb séances : | /semaine |
| Running                                                              | Durée (en heures)/ semaine | Nb séances : | /semaine |
| Natation                                                             | Durée (en heures)/ semaine | Nb séances : | /semaine |
| Aquagym                                                              | Durée (en heures)/ semaine | Nb séances : | /semaine |
| Aquabike                                                             | Durée (en heures)/ semaine | Nb séances : | /semaine |
| Squash                                                               | Durée (en heures)/ semaine | Nb séances : | /semaine |
| Golf                                                                 | Durée (en heures)/ semaine | Nb séances : | /semaine |
| Musculation                                                          | Durée (en heures)/ semaine | Nb séances : | /semaine |
| Vélo                                                                 | Durée (en heures)/ semaine | Nb séances : | /semaine |
| Vélo elliptique                                                      | Durée (en heures)/ semaine | Nb séances : | /semaine |
| Rameur                                                               | Durée (en heures)/ semaine | Nb séances : | /semaine |
| Gymnastique holistique (yoga, taïchi, pilates, stretching, taïso...) | Durée (en heures)/ semaine | Nb séances : | /semaine |
| Art martial                                                          | Durée (en heures)/ semaine | Nb séances : | /semaine |
| Autres, précisez :                                                   | Durée (en heures)/ semaine | Nb séances : | /semaine |
| Autres, précisez :                                                   | Durée (en heures)/ semaine | Nb séances : | /semaine |
| Autres, précisez :                                                   | Durée (en heures)/ semaine | Nb séances : | /semaine |

### EVALUATION DE LA DOULEUR

EVA : |\_|\_|\_|\_|/100

### MOUVEMENT EXECUTE/ IMAGINE

Durée du premier mouvement exécuté : |\_|\_|\_|\_|,|\_|\_|\_| secondes

Durée du second mouvement exécuté : |\_|\_|\_|\_|,|\_|\_|\_| secondes

Durée du premier mouvement simulé mentalement : |\_|\_|\_|\_|,|\_|\_|\_| secondes

Durée du second mouvement simulé mentalement : |\_|\_|\_|\_|,|\_|\_|\_| secondes

**QUESTIONNAIRE FIQ-R : Réalisé/ Non Réalisé**

1 – Etes-vous capable de :

Faire les courses :

- Toujours
- La plupart du temps
- De temps en temps
- Jamais
- ND

Faire la lessive en machine :

- Toujours
- La plupart du temps
- De temps en temps
- Jamais
- ND

Faire à manger :

- Toujours
- La plupart du temps
- De temps en temps
- Jamais
- ND

Faire la vaisselle à la main :

- Toujours
- La plupart du temps
- De temps en temps
- Jamais
- ND

Passer l'aspirateur :

- Toujours (
- La plupart du temps
- De temps en temps
- Jamais
- ND

Faire les lits :

- Toujours
- La plupart du temps
- De temps en temps
- Jamais
- ND

Marcher plusieurs centaines de mètres :

- Toujours
- La plupart du temps
- De temps en temps
- Jamais



- ND

Aller voir des amis ou de la famille :

- Toujours
- La plupart du temps
- De temps en temps
- Jamais
- ND

Faire du jardinage :

- Toujours
- La plupart du temps
- De temps en temps
- Jamais
- ND

Conduire une voiture :

- Toujours)
- La plupart du temps
- De temps en temps
- Jamais )
- ND

**Au cours des 7 derniers jours :**

2 – Combien de jour vous êtes-vous senti(e) bien ? |\_\_|

3 – Combien de journées de travail avez-vous manqué à cause de votre fibromyalgie ? |\_\_|

4 – Les jours où vous avez travaillé, les douleurs ou d'autres problèmes liés à votre fibromyalgie vous ont-ils gêné dans votre travail ? |\_\_|\_|,|\_\_|

5 – Avez-vous des douleurs ? |\_\_|\_|,|\_\_|

6 – Avez-vous été fatigué(e) ? |\_\_|\_|,|\_\_|

7 – Comment vous êtes-vous senti(e) le matin au réveil ? |\_\_|\_|,|\_\_|

8 – Vous êtes-vous senti(e) raide ? |\_\_|\_|,|\_\_|

9 – Vous êtes-vous senti(e) tendu(e) ou inquiet(e) ? |\_\_|\_|,|\_\_| (

10 – Vous êtes-vous senti(e) déprimé(e) ? |\_\_|\_|,|\_\_|

Score global: ...../100

**Si score > 59, INCLUSION A TORT**

### QUESTIONNAIRE DN4 : Réalisé/ Non Réalisé

1 – La douleur présente-t-elle une ou plusieurs des caractéristiques suivantes ?

- Brulure : Oui/ Non/ ND
- Sensation de froid douloureux: Oui/ Non/ ND
- Décharges électriques : Oui/ Non/ ND

2 – La douleur est-elle associée dans la même région à un ou plusieurs des symptômes suivants ?

- Fourmillements : Oui/ Non/ ND
- Picotements: Oui/ Non/ ND
- Engourdissements : Oui/ Non/ ND
- Démangeaisons : Oui/ Non/ ND

3 – La douleur est-elle localisée dans un territoire où l'examen met en évidence :

- Hypoesthésie au tact ? Oui/ Non/ ND
- Hypoesthésie à la piqûre ? Oui/ Non/ ND

4 – La douleur est-elle provoquée ou augmentée par :

- Le frottement ? Oui/ Non/ ND

Score du patient : ...../10

### QUESTIONNAIRE HAD : Réalisé/ Non Réalisé

1 – Je me sens tendu(e) ou énervé(e) :

- La plupart du temps
- Souvent
- De temps en temps
- Jamais
- ND

2 – Je prends plaisir aux mêmes choses qu'autrefois :

- Oui, tout autant
- Pas autant
- Un peu seulement
- Presque plus
- ND

3 – J'ai une sensation de peur comme si quelque chose d'horrible allait m'arriver :

- Oui, très nettement
- Oui, mais ce n'est pas trop grave
- Un peu, mais cela ne m'inquiète pas
- Pas du tout
- ND

4 – Je ris facilement et vois le bon côté des choses :

- Autant que par le passé
- Plus autant qu'avant



- Vraiment moins qu'avant
- Plus du tout
- ND

5 – Je me fais du souci :

- Très souvent
- Assez souvent
- Occasionnellement
- Très occasionnellement
- ND

6 – Je suis de bonne humeur :

- Jamais
- Rarement
- Assez souvent
- La plupart du temps
- ND

7 – Je peux rester tranquillement assis(se) à ne rien faire et me sentir décontracté(e) :

- Oui, quoi qu'il arrive
- Oui, en général
- Rarement
- Jamais
- ND

8 – J'ai l'impression de fonctionner au ralenti :

- Presque toujours
- Très souvent
- Parfois
- Jamais
- ND

9 – J'éprouve des sensations de peur et j'ai l'estomac noué :

- Jamais
- Parfois
- Assez souvent
- Très souvent
- ND

10 – Je ne m'intéresse plus à mon apparence :

- Plus du tout
- Je n'y accorde pas autant d'attention que je devrais
- Il se peut que je n'y fasse plus autant attention
- J'y prête autant d'attention que par le passé
- ND

11 – J'ai la bougeotte et n'arrive pas à tenir en place:

- Oui, c'est tout à fait le cas
- Un peu
- Pas tellement
- Pas du tout
- ND





12 – Je me réjouis d'avance à l'idée de faire certaines choses :

- Autant qu'avant
- Un peu moins qu'avant
- Bien moins qu'avant
- Presque jamais
- ND

13 – J'éprouve des sensations soudaines de panique:

- Vraiment très souvent
- Assez souvent
- Pas très souvent
- Jamais
- ND

14 – Je peux prendre plaisir à un bon livre ou à une bonne émission de radio ou de télévision :

- Souvent
- Parfois
- Rarement
- Très rarement
- ND

Score en lien avec l'anxiété : ..... / 21

Score en lien avec la dimension dépressive : ..... / 21

### QUESTIONNAIRE WPI : Réalisé/ Non Réalisé

Nombre de zones pour lesquelles le patient a ressenti de la douleur la semaine précédente : I\_\_I\_\_I/19

### ECHELLE DE SEVERITE DES SYMPTOMES

Intensité des symptômes (au cours de la semaine passée): Réalisé/ Non Réalisé

1- Fatigue

- Pas de problème
- Problèmes légers ou modérés, généralement modérés ou intermittents
- Problèmes modérés, considérables, souvent présents et/ou à niveau modéré
- Problèmes importants, persistants, continus, handicapants au quotidien
- ND

2- Somnolence

- Pas de problème
- Problèmes légers ou modérés, généralement modérés ou intermittents
- Problèmes modérés, considérables, souvent présents et/ou à niveau modéré
- Problèmes importants, persistants, continus, handicapants au quotidien
- ND

3- Symptômes cognitifs

- Pas de problème
- Problèmes légers ou modérés, généralement modérés ou intermittents
- Problèmes modérés, considérables, souvent présents et/ou à niveau modéré
- Problèmes importants, persistants, continus, handicapants au quotidien
- ND

Score : ...../9

Nombre de symptômes associés (au cours de la semaine passée) : Réalisé/ Non Réalisé

|                                                          |                                                        |                                                       |
|----------------------------------------------------------|--------------------------------------------------------|-------------------------------------------------------|
| <input type="checkbox"/> Douleur musculaire              | <input type="checkbox"/> Syndrome intestin irritable   | <input type="checkbox"/> Fatigue                      |
| <input type="checkbox"/> Problème mémoire, concentration | <input type="checkbox"/> Céphalées                     | <input type="checkbox"/> Douleur/ crampes abdominales |
| <input type="checkbox"/> Faiblesse musculaire            | <input type="checkbox"/> Engourdissement/ picotement   | <input type="checkbox"/> Vertiges                     |
| <input type="checkbox"/> Insomnie                        | <input type="checkbox"/> Dépression                    | <input type="checkbox"/> Nervosité                    |
| <input type="checkbox"/> Constipation                    | <input type="checkbox"/> Douleur abdominale haute      | <input type="checkbox"/> Nausée                       |
| <input type="checkbox"/> Douleur thoracique              | <input type="checkbox"/> Diarrhée                      | <input type="checkbox"/> Bouche sèche                 |
| <input type="checkbox"/> Vision floue                    | <input type="checkbox"/> Fièvre                        | <input type="checkbox"/> Démangeaisons                |
| <input type="checkbox"/> Sifflement respiratoire         | <input type="checkbox"/> Syndrome de Raynaud           | <input type="checkbox"/> Urticaire                    |
| <input type="checkbox"/> Acouphènes                      | <input type="checkbox"/> Vomissements                  | <input type="checkbox"/> Brûlure thoracique           |
| <input type="checkbox"/> Aphtes buccaux                  | <input type="checkbox"/> Perte ou modification du goût | <input type="checkbox"/> Crise d'épilepsie            |
| <input type="checkbox"/> Yeux secs                       | <input type="checkbox"/> Oppression respiratoire       | <input type="checkbox"/> Perte d'appétit              |
| <input type="checkbox"/> Eruption cutanée                | <input type="checkbox"/> Hypersensibilité au soleil    | <input type="checkbox"/> Troubles de l'audition       |
| <input type="checkbox"/> Ecchymoses faciles              | <input type="checkbox"/> Perte de cheveux              | <input type="checkbox"/> Mictions fréquentes          |
| <input type="checkbox"/> Douleurs à la miction           | <input type="checkbox"/> Spasmes de la vessie          |                                                       |

Score : ...../3

Score total : ...../12

### QUESTIONNAIRE DE TAMPA : Réalisé/ Non Réalisé

- 1- J'ai peur de me blesser si je fais de l'activité physique :
  - Fortement en désaccord
  - Quelque peu en désaccord
  - Quelque peu en accord
  - Fortement en accord
  - ND
- 2- Ma douleur ne ferait qu'intensifier si j'essayais de la vaincre :
  - Fortement en désaccord
  - Quelque peu en désaccord
  - Quelque peu en accord
  - Fortement en accord
  - ND
- 3- Mon corps me dit que quelque chose ne va vraiment pas :
  - Fortement en désaccord
  - Quelque peu en désaccord
  - Quelque peu en accord
  - Fortement en accord

- ND
- 4- Si je faisais de l'activité physique, ma douleur serait probablement soulagée:
  - Fortement en désaccord
  - Quelque peu en désaccord
  - Quelque peu en accord
  - Fortement en accord
  - ND
- 5- Les gens ne prennent pas mon état de santé au sérieux :
  - Fortement en désaccord
  - Quelque peu en désaccord
  - Quelque peu en accord
  - Fortement en accord
  - ND
- 6- Mon accident a mis mon corps en danger pour le reste de mes jours :
  - Fortement en désaccord
  - Quelque peu en désaccord
  - Quelque peu en accord
  - Fortement en accord
  - ND
- 7- La douleur signifie toujours que je me suis blessé(e) :
  - Fortement en désaccord
  - Quelque peu en désaccord
  - Quelque peu en accord
  - Fortement en accord
  - ND
- 8- Même si quelque chose aggrave ma douleur, cela ne veut pas dire que c'est dangereux :
  - Fortement en désaccord
  - Quelque peu en désaccord
  - Quelque peu en accord
  - Fortement en accord
  - ND
- 9- J'ai peur de me blesser accidentellement :
  - Fortement en désaccord
  - Quelque peu en désaccord
  - Quelque peu en accord
  - Fortement en accord
  - ND
- 10- La meilleure façon d'empêcher que ma douleur s'aggrave est de m'assurer de ne pas faire des mouvements inutiles :
  - Fortement en désaccord
  - Quelque peu en désaccord
  - Quelque peu en accord
  - Fortement en accord
  - ND
- 11- Je n'aurais pas tant que douleurs s'il ne se passait pas quelque chose de grave dans mon corps :

- Fortement en désaccord
- Quelque peu en désaccord
- Quelque peu en accord
- Fortement en accord
- ND

12- Bien que ma condition soit pénible, je serais mieux si j'étais physiquement actif(ve) :

- Fortement en désaccord
- Quelque peu en désaccord
- Quelque peu en accord
- Fortement en accord
- ND

13- La douleur m'indique quand arrêter de faire des activités physiques pour que je ne me blesse pas :

- Fortement en désaccord
- Quelque peu en désaccord
- Quelque peu en accord
- Fortement en accord
- ND

14- Il n'est pas prudent qu'une personne avec un état de santé comme le mien soit physiquement active :

- Fortement en désaccord
- Quelque peu en désaccord
- Quelque peu en accord
- Fortement en accord
- ND

15- Je ne peux pas faire tout ce qu'une personne normale peut faire parce que j'ai plus de risque de me blesser :

- Fortement en désaccord
- Quelque peu en désaccord
- Quelque peu en accord
- Fortement en accord
- ND

16- Bien qu'il y ait quelque chose qui me cause beaucoup de douleurs, je ne pense pas que ce soit vraiment grave :

- Fortement en désaccord
- Quelque peu en désaccord
- Quelque peu en accord
- Fortement en accord
- ND

17- Personne ne devrait être obligé de faire des exercices lorsqu'il (elle) ressent de la douleur :

- Fortement en désaccord
- Quelque peu en désaccord
- Quelque peu en accord
- Fortement en accord
- ND

Score : ...../68

**EQ-5D-5L : Réalisé/ Non Réalisé**

1- Mobilité

- Je n'ai aucun problème pour me déplacer à pied
- J'ai des problèmes légers pour me déplacer à pied
- J'ai des problèmes modérés pour me déplacer à pied
- J'ai des problèmes sévères pour me déplacer à pied
- Je suis incapable de me déplacer à pied
- ND

2 – Autonomie de la personne

- Je n'ai aucun problème pour me laver ou m'habiller tout(e) seul(e)
- J'ai des problèmes légers pour me laver ou m'habiller tout(e) seul(e)
- J'ai des problèmes modérés pour me laver ou m'habiller tout(e) seul(e)
- J'ai des problèmes sévères pour me laver ou m'habiller tout(e) seul(e)
- Je suis incapable de me laver ou de m'habiller tout(e) seul(e)
- ND

3 – Activités courantes

- Je n'ai aucun problème pour accomplir mes activités courantes
- J'ai des problèmes légers pour accomplir mes activités courantes
- J'ai des problèmes modérés pour accomplir mes activités courantes
- J'ai des problèmes sévères pour accomplir mes activités courantes
- Je suis incapable d'accomplir mes activités courantes
- ND

4 – Douleurs/ inconfort

- Je n'ai ni douleur, ni inconfort
- J'ai des douleurs ou un inconfort léger(ères)
- J'ai des douleurs ou un inconfort modéré(es)
- J'ai des douleurs ou un inconfort sévère(s)
- J'ai des douleurs ou un inconfort extrême(s)
- ND

5 – Anxiété/ dépression

- Je ne suis ni anxieux(se), ni déprimé(e)
- Je suis légèrement anxieux(se) ou déprimé(e)
- Je suis modérément anxieux(se) ou déprimé(e)
- Je suis sévèrement anxieux(se) ou déprimé(e)
- Je suis extrêmement anxieux(se) ou déprimé(e)
- ND

Etat de santé du jour : |\_|\_|\_|\_|/ 100

## IMPEDANCEMETRIE

Masse totale du patient : |\_|\_|\_|,|\_|\_| kg  
 Masse grasse du patient : |\_|\_|\_|,|\_|\_| kg  
 Pourcentage en termes de masse grasseuse: |\_|\_|\_| %

## TRAITEMENTS

**Le patient prend-il des traitements (*traitement de fond et traitement « si besoin »*)? : Oui / Non**  
*Si oui*, merci de bien vouloir compléter le tableau des traitements

| DCI            | Dose journalière | Unité                  |
|----------------|------------------|------------------------|
| ALMOTRIPTAN    |                  | mg                     |
| ALPRAZOLAM     |                  | mg                     |
| AMITRIPTYLINE  |                  | mg                     |
| ASPIRINE       |                  | g                      |
| ATENOLOL       |                  | mg                     |
| BACLOFENE      |                  | mg                     |
| BROMAZEPAM     |                  | mg                     |
| BUPRENORPHINE  |                  | mg                     |
| BUSPIRONE      |                  | mg                     |
| CANDESARTAN    |                  | mg                     |
| CAPASAICINE    |                  | patchs par application |
| CARBAMAZEPINE  |                  | mg                     |
| CELECOXIB      |                  | mg                     |
| CITALOPRAM     |                  | mg                     |
| CLOBAZAM       |                  | mg                     |
| CLOMIPRAMINE   |                  | mg                     |
| CLONIDINE      |                  | mg                     |
| CLORAZEPATE    |                  | mg                     |
| CLOTIAZEPAM    |                  | mg                     |
| CODEINE        |                  | mg                     |
| DEXAMETHASONE  |                  | mg                     |
| DIAZEPAM       |                  | mg                     |
| DICLOFENAC     |                  | mg                     |
| DIHYDROCODEINE |                  | mg                     |
| DRONABINOL     |                  | mg                     |
| DULOXETINE     |                  | mg                     |
| ELETRIPTAN     |                  | mg                     |
| ESCITALOPRAM   |                  | mg                     |
| ETORICOXIB     |                  | mg                     |
| FENTANYL       |                  | µg                     |

|                    |  |                         |
|--------------------|--|-------------------------|
| FENTANYL CITRATE   |  | µg                      |
| FLUOXETINE         |  | mg                      |
| FROVATRIPTAN       |  | mg                      |
| GABAPENTINE        |  | mg                      |
| HALOPERIDOL        |  | mg                      |
| HYDROMORPHONE      |  | mg                      |
| IBUPROFENE         |  | mg                      |
| INDOMETACINE       |  | mg                      |
| KETOPROFENE        |  | mg                      |
| LAMOTRIGINE        |  | mg                      |
| LIDOCAINE          |  | patches par application |
| LISINOPRIL         |  | mg                      |
| LOFLAZEPATE        |  | mg                      |
| LOPRAZOLAM         |  | mg                      |
| LORAZEPAN          |  | mg                      |
| LORMETAZEPAM       |  | mg                      |
| LOXAPINE           |  | mg                      |
| METHADONE          |  | mg                      |
| METHYLPREDNISOLONE |  | mg                      |
| METOPROLOL         |  | mg                      |
| MIANSERINE         |  | mg                      |
| MILNACIPRAN        |  | mg                      |
| MIRTAZAPINE        |  | mg                      |
| MORPHINE           |  | mg                      |
| NADOLOL            |  | mg                      |
| NAPROXENE          |  | mg                      |
| NARATRIPTAN        |  | mg                      |
| NEBIVOLOL          |  | mg                      |
| NEFOPAM            |  | mg                      |
| NORDAZEPAM         |  | mg                      |
| OLANZAPINE         |  | mg                      |
| OPIUM              |  | mg                      |
| OXAZEPAM           |  | mg                      |
| OXCARBAZEPINE      |  | mg                      |
| OXYCODONE          |  | mg                      |
| PARACETAMOL        |  | g                       |
| PAROXETINE         |  | mg                      |
| PHENOBARBITAL      |  | mg                      |
| PHLOROGLUCINOL     |  | mg                      |
| PIROXICAM          |  | mg                      |
| PRAZEPAM           |  | mg                      |
| PREDNISOLONE       |  | mg                      |
| PREDNISONNE        |  | mg                      |
| PREGABALINE        |  | mg                      |
| PROPRANOLOL        |  | mg                      |
| RISPERIDONE        |  | mg                      |
| RIZATRIPTAN        |  | mg                      |



« Fibromyalgie et activité physique spécifique »

FibrAPSpé – Thomas Rulleau

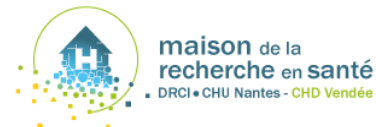

|                |  |    |
|----------------|--|----|
| SUMATRIPTAN    |  | mg |
| THIOLCHICOSIDE |  | mg |
| TIMOLOL        |  | mg |
| TOPIRAMATE     |  | mg |
| TRAMADOL       |  | mg |
| TRIMEBUTINE    |  | mg |
| VALPROATE      |  | mg |
| VENLAFAXINE    |  | mg |
| ZOLMITRIPTAN   |  | mg |
| ZOLPIDEM       |  | mg |
| ZOPICLONE      |  | mg |

### Patchs QUTENZA

Le patient a-t-il pris du QUTENZA SUR LES 3 MOIS PRECEDENTS LA VISITE?: Oui / Non

Si oui, |\_|\_| patchs par application





« Fibromyalgie et activité physique spécifique »

FibrAPSpé – Thomas Rulleau

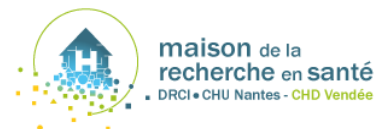

## Visite de suivi (M6) (+/- 15 jours)

### EVENEMENTS INDESIRABLES

---

➔ Se reporter à la section « Événements Indésirables »

A compléter si un événement indésirable est survenu depuis la visite précédente (inclusion).

#### Liste des évènements indésirables à déclarer :

- Troubles fonctionnels consécutifs aux séances d'activité physiques empêchant la réalisation/ poursuite d'une activité physique
- Dysfonctionnement du système de tracking d'activité
- Faits nouveaux

### DECES

---

➔ Se reporter à la section « Décès » (page de fin d'étude)



**Visite de suivi (M6) (+/- 15 jours)**

Date: |\_|\_|/|\_|\_|/|\_|\_|\_|\_|

**ACTIVITE PROFESSIONNELLE**

Activité professionnelle en cours : Oui/ Non/ ND

Arrêt de travail entre la visite d'inclusion et la visite de suivi M6 : Oui/ Non

Si oui, compléter le tableau ci-dessous :

| Date(s) d'arrêt     | Date(s) de reprise associée(s) |
|---------------------|--------------------------------|
| _ _ / _ _ / _ _ _ _ | _ _ / _ _ / _ _ _ _            |
| _ _ / _ _ / _ _ _ _ | _ _ / _ _ / _ _ _ _            |
|                     |                                |

**CONSULTATIONS MEDICALES**

Consultation auprès d'un médecin généraliste depuis la dernière visite (pour un motif en lien avec la fibromyalgie ou ses conséquences)? Oui/ Non/ ND

Si oui, nombre de consultations : |\_|\_|

Consultation auprès d'un médecin spécialiste depuis la dernière visite (pour un motif en lien avec la fibromyalgie ou ses conséquences)? Oui/ Non/ ND

Si oui, merci de compléter le tableau ci-dessous :

| Type de spécialiste                        | Nombre de consultations |
|--------------------------------------------|-------------------------|
| Rhumatologue                               | _ _                     |
| Algologue                                  | _ _                     |
| Psychiatre                                 | _ _                     |
| Psychologue                                | _ _                     |
| Neurologue                                 | _ _                     |
| Radiologue                                 | _ _                     |
| Médecin du sport                           | _ _                     |
| Médecin de médecine physique, réadaptation | _ _                     |
| Autres, précisez : .....                   | _ _                     |
| Autres, précisez : .....                   | _ _                     |

Hospitalisation depuis la dernière visite (pour un motif en lien avec la fibromyalgie ou ses conséquences) ? Oui/ Non/ ND

Si oui,

| Date de début | Date de fin | Motif | Service concerné |
|---------------|-------------|-------|------------------|
|               |             |       |                  |
|               |             |       |                  |
|               |             |       |                  |

## EVALUATION DE LA DOULEUR

EVA : |\_|\_|\_|\_|/100

## MOUVEMENT EXECUTE/ IMAGINE

Durée du premier mouvement exécuté : |\_|\_|\_|\_|, |\_|\_|\_| secondes

Durée du second mouvement exécuté : |\_|\_|\_|\_|, |\_|\_|\_| secondes

Durée du premier mouvement simulé mentalement : |\_|\_|\_|\_|, |\_|\_|\_| secondes

Durée du second mouvement simulé mentalement : |\_|\_|\_|\_|, |\_|\_|\_| secondes

## QUESTIONNAIRE FIQ-R : Réalisé/ Non Réalisé

1 – Etes-vous capable de :

Faire les courses :

- Toujours
- La plupart du temps
- De temps en temps
- Jamais
- ND

Faire la lessive en machine :

- Toujours
- La plupart du temps
- De temps en temps
- Jamais
- ND

Faire à manger :

- Toujours
- La plupart du temps
- De temps en temps
- Jamais
- ND

Faire la vaisselle à la main :

- Toujours
- La plupart du temps
- De temps en temps
- Jamais
- ND

Passer l'aspirateur :

- Toujours (
- La plupart du temps
- De temps en temps
- Jamais
- ND

Faire les lits :

- Toujours
- La plupart du temps
- De temps en temps
- Jamais
- ND

Marcher plusieurs centaines de mètres :

- Toujours
- La plupart du temps
- De temps en temps
- Jamais
- ND

Aller voir des amis ou de la famille :

- Toujours
- La plupart du temps
- De temps en temps
- Jamais
- ND

Faire du jardinage :

- Toujours
- La plupart du temps
- De temps en temps
- Jamais
- ND

Conduire une voiture :

- Toujours)
- La plupart du temps
- De temps en temps
- Jamais )
- ND

Au cours des 7 derniers jours :

2 – Combien de jour vous êtes-vous senti(e) bien ? |\_\_|

3 – Combien de journées de travail avez-vous manqué à cause de votre fibromyalgie ? |\_\_|

4 – Les jours où vous avez travaillé, les douleurs ou d'autres problèmes liés à votre fibromyalgie vous ont-ils gêné dans votre travail ? |\_\_|\_\_|,|\_\_|



5 – Avez-vous des douleurs ? |\_\_|\_\_|,|\_\_|

6 – Avez-vous été fatigué(e) ? |\_\_|\_\_|,|\_\_|

7 – Comment vous êtes-vous senti(e) le matin au réveil ? |\_\_|\_\_|,|\_\_|

8 – Vous êtes-vous senti(e) raide ? |\_\_|\_\_|,|\_\_|

9 – Vous êtes-vous senti(e) tendu(e) ou inquiet(e) ? |\_\_|\_\_|,|\_\_| (

10 – Vous êtes-vous senti(e) déprimé(e) ? |\_\_|\_\_|,|\_\_|

Score global: ...../100

#### QUESTIONNAIRE DN4 : Réalisé/ Non réalisé

1 – La douleur présente-t-elle une ou plusieurs des caractéristiques suivantes ?

- Brulure : Oui/ Non/ ND
- Sensation de froid douloureux: Oui/ Non/ ND
- Décharges électriques : Oui/ Non/ ND

2 – La douleur est-elle associée dans la même région à un ou plusieurs des symptômes suivants ?

- Fourmillements : Oui/ Non/ ND
- Picotements: Oui/ Non/ ND
- Engourdissements : Oui/ Non/ ND
- Démangeaisons : Oui/ Non/ ND

3 – La douleur est-elle localisée dans un territoire où l'examen met en évidence :

- Hypoesthésie au tact ? Oui/ Non/ ND
- Hypoesthésie à la piqûre ? Oui/ Non/ ND

4 – La douleur est-elle provoquée ou augmentée par :

- Le frottement ? Oui/ Non/ ND

Score du patient : ...../10

**QUESTIONNAIRE HAD : Réalisé/ Non réalisé**

1 – Je me sens tendu(e) ou énervé(e) :

- La plupart du temps
- Souvent
- De temps en temps
- Jamais
- ND

2 – Je prends plaisir aux mêmes choses qu'autrefois :

- Oui, tout autant
- Pas autant
- Un peu seulement
- Presque plus
- ND

3 – J'ai une sensation de peur comme si quelque chose d'horrible allait m'arriver :

- Oui, très nettement
- Oui, mais ce n'est pas trop grave
- Un peu, mais cela ne m'inquiète pas
- Pas du tout
- ND

4 – Je ris facilement et vois le bon côté des choses :

- Autant que par le passé
- Plus autant qu'avant
- Vraiment moins qu'avant
- Plus du tout
- ND

5 – Je me fais du souci :

- Très souvent
- Assez souvent
- Occasionnellement
- Très occasionnellement
- ND

6 – Je suis de bonne humeur :

- Jamais
- Rarement
- Assez souvent
- La plupart du temps
- ND

7 – Je peux rester tranquillement assis(se) à ne rien faire et me sentir décontracté(e) :

- Oui, quoi qu'il arrive
- Oui, en général
- Rarement
- Jamais
- ND



8 – J’ai l’impression de fonctionner au ralenti :

- Presque toujours
- Très souvent
- Parfois
- Jamais
- ND

9 – J’éprouve des sensations de peur et j’ai l’estomac noué :

- Jamais
- Parfois
- Assez souvent
- Très souvent
- ND

10 – Je ne m’intéresse plus à mon apparence :

- Plus du tout
- Je n’y accorde pas autant d’attention que je devrais
- Il se peut que je n’y fasse plus autant attention
- J’y prête autant d’attention que par le passé
- ND

11 – J’ai la bougeotte et n’arrive pas à tenir en place:

- Oui, c’est tout à fait le cas
- Un peu
- Pas tellement
- Pas du tout
- ND

12 – Je me réjouis d’avance à l’idée de faire certaines choses :

- Autant qu’avant
- Un peu moins qu’avant
- Bien moins qu’avant
- Presque jamais
- ND

13 – J’éprouve des sensations soudaines de panique:

- Vraiment très souvent
- Assez souvent
- Pas très souvent
- Jamais
- ND

14 – Je peux prendre plaisir à un bon livre ou à une bonne émission de radio ou de télévision :

- Souvent
- Parfois
- Rarement
- Très rarement
- ND

Score en lien avec l’anxiété : ..... / 21

Score en lien avec la dimension dépressive : ..... / 21

**QUESTIONNAIRE WPI : Réalisé/ Non réalisé**

Nombre de zones pour lesquelles le patient a ressenti de la douleur la semaine précédente : I\_\_I\_\_I/19

**ECHELLE DE SEVERITE DES SYMPTOMES**

Intensité des symptômes (au cours de la semaine passée): Réalisé/ Non Réalisé

4- Fatigue

- Pas de problème
- Problèmes légers ou modérés, généralement modérés ou intermittents
- Problèmes modérés, considérables, souvent présents et/ou à niveau modéré
- Problèmes importants, persistants, continus, handicapants au quotidien
- ND

5- Somnolence

- Pas de problème
- Problèmes légers ou modérés, généralement modérés ou intermittents
- Problèmes modérés, considérables, souvent présents et/ou à niveau modéré
- Problèmes importants, persistants, continus, handicapants au quotidien
- ND

6- Symptômes cognitifs

- Pas de problème
- Problèmes légers ou modérés, généralement modérés ou intermittents
- Problèmes modérés, considérables, souvent présents et/ou à niveau modéré
- Problèmes importants, persistants, continus, handicapants au quotidien
- ND

Score : ...../9

Nombre de symptômes associés (au cours de la semaine passée) : Réalisé/ Non Réalisé

|                                                          |                                                        |                                                       |
|----------------------------------------------------------|--------------------------------------------------------|-------------------------------------------------------|
| <input type="checkbox"/> Douleur musculaire              | <input type="checkbox"/> Syndrome intestin irritable   | <input type="checkbox"/> Fatigue                      |
| <input type="checkbox"/> Problème mémoire, concentration | <input type="checkbox"/> Céphalées                     | <input type="checkbox"/> Douleur/ crampes abdominales |
| <input type="checkbox"/> Faiblesse musculaire            | <input type="checkbox"/> Engourdissement/ picotement   | <input type="checkbox"/> Vertiges                     |
| <input type="checkbox"/> Insomnie                        | <input type="checkbox"/> Dépression                    | <input type="checkbox"/> Nervosité                    |
| <input type="checkbox"/> Constipation                    | <input type="checkbox"/> Douleur abdominale haute      | <input type="checkbox"/> Nausée                       |
| <input type="checkbox"/> Douleur thoracique              | <input type="checkbox"/> Diarrhée                      | <input type="checkbox"/> Bouche sèche                 |
| <input type="checkbox"/> Vision floue                    | <input type="checkbox"/> Fièvre                        | <input type="checkbox"/> Démangeaisons                |
| <input type="checkbox"/> Sifflement respiratoire         | <input type="checkbox"/> Syndrome de Raynaud           | <input type="checkbox"/> Urticaire                    |
| <input type="checkbox"/> Acouphènes                      | <input type="checkbox"/> Vomissements                  | <input type="checkbox"/> Brûlure thoracique           |
| <input type="checkbox"/> Aphtes buccaux                  | <input type="checkbox"/> Perte ou modification du goût | <input type="checkbox"/> Crise d'épilepsie            |
| <input type="checkbox"/> Yeux secs                       | <input type="checkbox"/> Oppression respiratoire       | <input type="checkbox"/> Perte d'appétit              |





|                                                |                                                     |                                                 |
|------------------------------------------------|-----------------------------------------------------|-------------------------------------------------|
| <input type="checkbox"/> Eruption cutanée      | <input type="checkbox"/> Hypersensibilité au soleil | <input type="checkbox"/> Troubles de l'audition |
| <input type="checkbox"/> Ecchymoses faciles    | <input type="checkbox"/> Perte de cheveux           | <input type="checkbox"/> Mictions fréquentes    |
| <input type="checkbox"/> Douleurs à la miction | <input type="checkbox"/> Spasmes de la vessie       |                                                 |

**QUESTIONNAIRE DE TAMPA : Réalisé/ Non réalisé**

18- J'ai peur de me blesser si je fais de l'activité physique :

- Fortement en désaccord
- Quelque peu en désaccord
- Quelque peu en accord
- Fortement en accord
- ND

19- Ma douleur ne ferait qu'intensifier si j'essayais de la vaincre :

- Fortement en désaccord
- Quelque peu en désaccord
- Quelque peu en accord
- Fortement en accord
- ND

20- Mon corps me dit que quelque chose ne va vraiment pas :

- Fortement en désaccord
- Quelque peu en désaccord
- Quelque peu en accord
- Fortement en accord
- ND

21- Si je faisais de l'activité physique, ma douleur serait probablement soulagée:

- Fortement en désaccord
- Quelque peu en désaccord
- Quelque peu en accord
- Fortement en accord
- ND

22- Les gens ne prennent pas mon état de santé au sérieux :

- Fortement en désaccord
- Quelque peu en désaccord
- Quelque peu en accord
- Fortement en accord
- ND

23- Mon accident a mis mon corps en danger pour le reste de mes jours :

- Fortement en désaccord
- Quelque peu en désaccord
- Quelque peu en accord
- Fortement en accord
- ND

24- La douleur signifie toujours que je me suis blessé(e) :

- Fortement en désaccord
- Quelque peu en désaccord
- Quelque peu en accord
- Fortement en accord
- ND

25- Même si quelque chose aggrave ma douleur, cela ne veut pas dire que c'est dangereux :

- Fortement en désaccord
- Quelque peu en désaccord
- Quelque peu en accord
- Fortement en accord
- ND

26- J'ai peur de me blesser accidentellement :

- Fortement en désaccord
- Quelque peu en désaccord
- Quelque peu en accord
- Fortement en accord
- ND

27- La meilleure façon d'empêcher que ma douleur s'aggrave est de m'assurer de ne pas faire des mouvements inutiles :

- Fortement en désaccord
- Quelque peu en désaccord
- Quelque peu en accord
- Fortement en accord
- ND

28- Je n'aurais pas tant que douleurs s'il ne se passait pas quelque chose de grave dans mon corps :

- Fortement en désaccord
- Quelque peu en désaccord
- Quelque peu en accord
- Fortement en accord
- ND

29- Bien que ma condition soit pénible, je serais mieux si j'étais physiquement actif(ve) :

- Fortement en désaccord
- Quelque peu en désaccord
- Quelque peu en accord
- Fortement en accord
- ND

30- La douleur m'indique quand arrêter de faire des activités physiques pour que je ne me blesse pas :

- Fortement en désaccord
- Quelque peu en désaccord
- Quelque peu en accord
- Fortement en accord
- ND

31- Il n'est pas prudent qu'une personne avec un état de santé comme le mien soit physiquement

active :

- Fortement en désaccord
- Quelque peu en désaccord
- Quelque peu en accord
- Fortement en accord
- ND

32- Je ne peux pas faire tout ce qu'une personne normale peut faire parce que j'ai plus de risque de me blesser :

- Fortement en désaccord
- Quelque peu en désaccord
- Quelque peu en accord
- Fortement en accord
- ND

33- Bien qu'il y ait quelque chose qui me cause beaucoup de douleurs, je ne pense pas que ce soit vraiment grave :

- Fortement en désaccord
- Quelque peu en désaccord
- Quelque peu en accord
- Fortement en accord
- ND

34- Personne ne devrait être obligé de faire des exercices lorsqu'il (elle) ressent de la douleur :

- Fortement en désaccord
- Quelque peu en désaccord
- Quelque peu en accord
- Fortement en accord
- ND

Score : ...../68

### EQ-5D-5L : Réalisé/ Non Réalisé

#### 2- Mobilité

- Je n'ai aucun problème pour me déplacer à pied
- J'ai des problèmes légers pour me déplacer à pied
- J'ai des problèmes modérés pour me déplacer à pied
- J'ai des problèmes sévères pour me déplacer à pied
- Je suis incapable de me déplacer à pied
- ND

#### 2 – Autonomie de la personne

- Je n'ai aucun problème pour me laver ou m'habiller tout(e) seul(e)
- J'ai des problèmes légers pour me laver ou m'habiller tout(e) seul(e)
- J'ai des problèmes modérés pour me laver ou m'habiller tout(e) seul(e)
- J'ai des problèmes sévères pour me laver ou m'habiller tout(e) seul(e)
- Je suis incapable de me laver ou de m'habiller tout(e) seul(e)
- ND

#### 3 – Activités courantes



- Je n'ai aucun problème pour accomplir mes activités courantes
- J'ai des problèmes légers pour accomplir mes activités courantes
- J'ai des problèmes modérés pour accomplir mes activités courantes
- J'ai des problèmes sévères pour accomplir mes activités courantes
- Je suis incapable d'accomplir mes activités courantes
- ND

4 – Douleurs/ inconfort

- Je n'ai ni douleur, ni inconfort
- J'ai des douleurs ou un inconfort léger(ères)
- J'ai des douleurs ou un inconfort modéré(es)
- J'ai des douleurs ou un inconfort sévère(s)
- J'ai des douleurs ou un inconfort extrême(s)
- ND

5 – Anxiété/ dépression

- Je ne suis ni anxieux(se), ni déprimé(e)
- Je suis légèrement anxieux(se) ou déprimé(e)
- Je suis modérément anxieux(se) ou déprimé(e)
- Je suis sévèrement anxieux(se) ou déprimé(e)
- Je suis extrêmement anxieux(se) ou déprimé(e)
- ND

Etat de santé du jour : |\_\_|\_\_|\_\_| / 100

### IMPEDANCEMETRIE

Masse totale du patient : |\_\_|\_\_|,|\_\_| kg

Masse grasse du patient : |\_\_|\_\_|,|\_\_| kg

Pourcentage en termes de masse grasseuse: |\_\_|\_\_| %

## TRAITEMENTS

**Le patient prend-il des traitements (*traitement de fond et traitement « si besoin »*)?:** Oui / Non  
*Si oui*, merci de bien vouloir compléter le tableau des traitements

| DCI              | Dose journalière | Unité                  |
|------------------|------------------|------------------------|
| ALMOTRIPTAN      |                  | mg                     |
| ALPRAZOLAM       |                  | mg                     |
| AMITRIPTYLINE    |                  | mg                     |
| ASPIRINE         |                  | g                      |
| ATENOLOL         |                  | mg                     |
| BACLOFENE        |                  | mg                     |
| BROMAZEPAM       |                  | mg                     |
| BUPRENORPHINE    |                  | mg                     |
| BUSPIRONE        |                  | mg                     |
| CANDESARTAN      |                  | mg                     |
| CAPASAICINE      |                  | patchs par application |
| CARBAMAZEPINE    |                  | mg                     |
| CELECOXIB        |                  | mg                     |
| CITALOPRAM       |                  | mg                     |
| CLOBAZAM         |                  | mg                     |
| CLOMIPRAMINE     |                  | mg                     |
| CLONIDINE        |                  | mg                     |
| CLORAZEPATE      |                  | mg                     |
| CLOTIAZEPAM      |                  | mg                     |
| CODEINE          |                  | mg                     |
| DEXAMETHASONE    |                  | mg                     |
| DIAZEPAM         |                  | mg                     |
| DICLOFENAC       |                  | mg                     |
| DIHYDROCODEINE   |                  | mg                     |
| DRONABINOL       |                  | mg                     |
| DULOXETINE       |                  | mg                     |
| ELETRIPTAN       |                  | mg                     |
| ESCITALOPRAM     |                  | mg                     |
| ETORICOXIB       |                  | mg                     |
| FENTANYL         |                  | µg                     |
| FENTANYL CITRATE |                  | µg                     |
| FLUOXETINE       |                  | mg                     |
| FROVATRIPTAN     |                  | mg                     |
| GABAPENTINE      |                  | mg                     |
| HALOPERIDOL      |                  | mg                     |
| HYDROMORPHONE    |                  | mg                     |
| IBUPROFENE       |                  | mg                     |
| INDOMETACINE     |                  | mg                     |

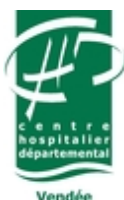

|                    |  |                         |
|--------------------|--|-------------------------|
| KETOPROFENE        |  | mg                      |
| LAMOTRIGINE        |  | mg                      |
| LIDOCAINE          |  | patches par application |
| LISINOPRIL         |  | mg                      |
| LOFLAZEPATE        |  | mg                      |
| LOPRAZOLAM         |  | mg                      |
| LORAZEPAN          |  | mg                      |
| LORMETAZEPAM       |  | mg                      |
| LOXAPINE           |  | mg                      |
| METHADONE          |  | mg                      |
| METHYLPREDNISOLONE |  | mg                      |
| METOPROLOL         |  | mg                      |
| MIANSERINE         |  | mg                      |
| MILNACIPRAN        |  | mg                      |
| MIRTAZAPINE        |  | mg                      |
| MORPHINE           |  | mg                      |
| NADOLOL            |  | mg                      |
| NAPROXENE          |  | mg                      |
| NARATRIPTAN        |  | mg                      |
| NEBIVOLOL          |  | mg                      |
| NEFOPAM            |  | mg                      |
| NORDAZEPAM         |  | mg                      |
| OLANZAPINE         |  | mg                      |
| OPIUM              |  | mg                      |
| OXAZEPAM           |  | mg                      |
| OXCARBAZEPINE      |  | mg                      |
| OXYCODONE          |  | mg                      |
| PARACETAMOL        |  | g                       |
| PAROXETINE         |  | mg                      |
| PHENOBARBITAL      |  | mg                      |
| PHLOROGLUCINOL     |  | mg                      |
| PIROXICAM          |  | mg                      |
| PRAZEPAM           |  | mg                      |
| PREDNISOLONE       |  | mg                      |
| PREDNISONNE        |  | mg                      |
| PREGABALINE        |  | mg                      |
| PROPRANOLOL        |  | mg                      |
| RISPERIDONE        |  | mg                      |
| RIZATRIPTAN        |  | mg                      |
| SUMATRIPTAN        |  | mg                      |
| THIOLCHICOSIDE     |  | mg                      |
| TIMOLOL            |  | mg                      |
| TOPIRAMATE         |  | mg                      |
| TRAMADOL           |  | mg                      |
| TRIMEBUTINE        |  | mg                      |
| VALPROATE          |  | mg                      |
| VENLAFAXINE        |  | mg                      |



« Fibromyalgie et activité physique spécifique »

FibrAPSpé – Thomas Rulleau

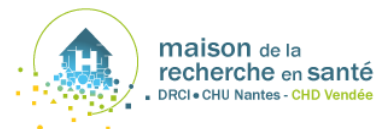

|              |  |    |
|--------------|--|----|
| ZOLMITRIPTAN |  | mg |
| ZOLPIDEM     |  | mg |
| ZOPICLONE    |  | mg |

### Patchs QUTENZA

Le patient a-t-il pris du QUTENZA SUR LES 3 MOIS PRECEDENTS LA VISITE? : Oui / Non

Si oui, |\_|\_| patches par application



« Fibromyalgie et activité physique spécifique »

FibrAPSpé – Thomas Rulleau



## Visite de suivi (M12) (+/- 15 jours)

### EVENEMENTS INDESIRABLES

---

➔ **Se reporter à la section « Événements Indésirables »**

A compléter si un événement indésirable est survenu depuis la visite précédente (M6).

#### Liste des évènements indésirables à déclarer :

- Troubles fonctionnels consécutifs aux séances d'activité physique empêchant la réalisation/ poursuite d'une activité physique
- Dysfonctionnement du système de tracking
- Faits nouveaux

### DECES

---

➔ **Se reporter à la section « Décès »** (page de fin d'étude)



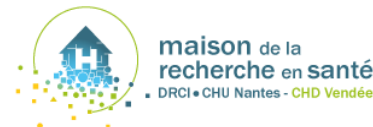

**Visite de suivi (M12) (+/- 15 jours)**

Date: |\_|\_|/|\_|\_|/|\_|\_|\_|\_|

**ACTIVITE PROFESSIONNELLE**

Activité professionnelle en cours : Oui/ Non/ ND

Arrêt de travail entre la visite de suivi M6 et la visite de suivi M12 : Oui/ Non

Si oui, compléter le tableau ci-dessous :

| Date(s) d'arrêt     | Date(s) de reprise associée(s) |
|---------------------|--------------------------------|
| _ _ / _ _ / _ _ _ _ | _ _ / _ _ / _ _ _ _            |
| _ _ / _ _ / _ _ _ _ | _ _ / _ _ / _ _ _ _            |
|                     |                                |

**CONSULTATIONS MEDICALES**

Consultation auprès d'un médecin généraliste depuis la dernière visite (pour un motif en lien avec la fibromyalgie ou ses conséquences)? Oui/ Non/ ND

Si oui, nombre de consultations : |\_|\_|

Consultation auprès d'un médecin spécialiste depuis la dernière visite (pour un motif en lien avec la fibromyalgie ou ses conséquences)? Oui/ Non/ ND

Si oui, merci de compléter le tableau ci-dessous :

| Type de spécialiste                        | Nombre de consultations |
|--------------------------------------------|-------------------------|
| Rhumatologue                               | _ _                     |
| Algologue                                  | _ _                     |
| Psychiatre                                 | _ _                     |
| Psychologue                                | _ _                     |
| Neurologue                                 | _ _                     |
| Radiologue                                 | _ _                     |
| Médecin du sport                           | _ _                     |
| Médecin de médecine physique, réadaptation | _ _                     |
| Autres, précisez : .....                   | _ _                     |
| Autres, précisez : .....                   | _ _                     |

Hospitalisation depuis la dernière visite (pour un motif en lien avec la fibromyalgie ou ses conséquences) ? Oui/ Non/ ND

Si oui,

| Date de début | Date de fin | Motif | Service concerné |
|---------------|-------------|-------|------------------|
|               |             |       |                  |
|               |             |       |                  |
|               |             |       |                  |

### EVALUATION DE LA DOULEUR

EVA : |\_|\_|\_|\_|/100

### MOUVEMENT EXECUTE/ IMAGINE

Durée du premier mouvement exécuté : |\_|\_|\_|\_|, |\_|\_|\_| secondes

Durée du second mouvement exécuté : |\_|\_|\_|\_|, |\_|\_|\_| secondes

Durée du premier mouvement simulé mentalement : |\_|\_|\_|\_|, |\_|\_|\_| secondes

Durée du second mouvement simulé mentalement : |\_|\_|\_|\_|, |\_|\_|\_| secondes

### QUESTIONNAIRE FIQ-R : Réalisé/ Non Réalisé

1 – Etes-vous capable de :

Faire les courses :

- Toujours
- La plupart du temps
- De temps en temps
- Jamais
- ND

Faire la lessive en machine :

- Toujours
- La plupart du temps
- De temps en temps
- Jamais
- ND

Faire à manger :

- Toujours
- La plupart du temps
- De temps en temps
- Jamais
- ND

Faire la vaisselle à la main :

- Toujours
- La plupart du temps
- De temps en temps
- Jamais
- ND

Passer l'aspirateur :

- Toujours (
- La plupart du temps
- De temps en temps
- Jamais
- ND

Faire les lits :

- Toujours
- La plupart du temps
- De temps en temps
- Jamais
- ND

Marcher plusieurs centaines de mètres :

- Toujours
- La plupart du temps
- De temps en temps
- Jamais
- ND

Aller voir des amis ou de la famille :

- Toujours
- La plupart du temps
- De temps en temps
- Jamais
- ND

Faire du jardinage :

- Toujours
- La plupart du temps
- De temps en temps
- Jamais
- ND

Conduire une voiture :

- Toujours)
- La plupart du temps
- De temps en temps
- Jamais )
- ND

**Au cours des 7 derniers jours :**

2 – Combien de jour vous êtes-vous senti(e) bien ? |\_\_|

3 – Combien de journées de travail avez-vous manqué à cause de votre fibromyalgie ? |\_\_|

4 – Les jours où vous avez travaillé, les douleurs ou d'autres problèmes liés à votre fibromyalgie vous ont-ils gêné dans votre travail ? |\_\_|\_\_|,|\_\_|



5 – Avez-vous des douleurs ? |\_|\_|\_|,|\_|\_|

6 – Avez-vous été fatigué(e) ? |\_|\_|\_|,|\_|\_|

7 – Comment vous êtes-vous senti(e) le matin au réveil ? |\_|\_|\_|,|\_|\_|

8 – Vous êtes-vous senti(e) raide ? |\_|\_|\_|,|\_|\_|

9 – Vous êtes-vous senti(e) tendu(e) ou inquiet(e) ? |\_|\_|\_|,|\_|\_| (

10 – Vous êtes-vous senti(e) déprimé(e) ? |\_|\_|\_|,|\_|\_|

Score global: ...../100

#### QUESTIONNAIRE DN4 : Réalisé/ Non réalisé

1 – La douleur présente-t-elle une ou plusieurs des caractéristiques suivantes ?

- Brulure : Oui/ Non/ ND
- Sensation de froid douloureux: Oui/ Non/ ND
- Décharges électriques : Oui/ Non/ ND

2 – La douleur est-elle associée dans la même région à un ou plusieurs des symptômes suivants ?

- Fourmillements : Oui/ Non/ ND
- Picotements: Oui/ Non/ ND
- Engourdissements : Oui/ Non/ ND
- Démangeaisons : Oui/ Non/ ND

3 – La douleur est-elle localisée dans un territoire où l'examen met en évidence :

- Hypoesthésie au tact ? Oui/ Non/ ND
- Hypoesthésie à la piqûre ? Oui/ Non/ ND

4 – La douleur est-elle provoquée ou augmentée par :

- Le frottement ? Oui/ Non/ ND

**QUESTIONNAIRE HAD : Réalisé/ Non réalisé**

1 – Je me sens tendu(e) ou énervé(e) :

- La plupart du temps
- Souvent
- De temps en temps
- Jamais
- ND

2 – Je prends plaisir aux mêmes choses qu'autrefois :

- Oui, tout autant
- Pas autant
- Un peu seulement
- Presque plus
- ND

3 – J'ai une sensation de peur comme si quelque chose d'horrible allait m'arriver :

- Oui, très nettement
- Oui, mais ce n'est pas trop grave
- Un peu, mais cela ne m'inquiète pas
- Pas du tout
- ND

4 – Je ris facilement et vois le bon côté des choses :

- Autant que par le passé
- Plus autant qu'avant
- Vraiment moins qu'avant
- Plus du tout
- ND

5 – Je me fais du souci :

- Très souvent
- Assez souvent
- Occasionnellement
- Très occasionnellement
- ND

6 – Je suis de bonne humeur :

- Jamais
- Rarement
- Assez souvent
- La plupart du temps
- ND

7 – Je peux rester tranquillement assis(se) à ne rien faire et me sentir décontracté(e) :

- Oui, quoi qu'il arrive
- Oui, en général
- Rarement
- Jamais
- ND



8 – J’ai l’impression de fonctionner au ralenti :

- Presque toujours
- Très souvent
- Parfois
- Jamais
- ND

9 – J’éprouve des sensations de peur et j’ai l’estomac noué :

- Jamais
- Parfois
- Assez souvent
- Très souvent
- ND

10 – Je ne m’intéresse plus à mon apparence :

- Plus du tout
- Je n’y accorde pas autant d’attention que je devrais
- Il se peut que je n’y fasse plus autant attention
- J’y prête autant d’attention que par le passé
- ND

11 – J’ai la bougeotte et n’arrive pas à tenir en place:

- Oui, c’est tout à fait le cas
- Un peu
- Pas tellement
- Pas du tout
- ND

12 – Je me réjouis d’avance à l’idée de faire certaines choses :

- Autant qu’avant
- Un peu moins qu’avant
- Bien moins qu’avant
- Presque jamais
- ND

13 – J’éprouve des sensations soudaines de panique:

- Vraiment très souvent
- Assez souvent
- Pas très souvent
- Jamais
- ND

14 – Je peux prendre plaisir à un bon livre ou à une bonne émission de radio ou de télévision :

- Souvent
- Parfois
- Rarement
- Très rarement
- ND

Score en lien avec l’anxiété : ..... / 21

Score en lien avec la dimension dépressive : ..... / 21

**QUESTIONNAIRE WPI : Réalisé/ Non réalisé**

Nombre de zones pour lesquelles le patient a ressenti de la douleur la semaine précédente : I\_\_I\_\_I/19

**ECHELLE DE SEVERITE DES SYMPTOMES**

Intensité des symptômes (au cours de la semaine passée): Réalisé/ Non Réalisé

7- Fatigue

- Pas de problème
- Problèmes légers ou modérés, généralement modérés ou intermittents
- Problèmes modérés, considérables, souvent présents et/ou à niveau modéré
- Problèmes importants, persistants, continus, handicapants au quotidien
- ND

8- Somnolence

- Pas de problème
- Problèmes légers ou modérés, généralement modérés ou intermittents
- Problèmes modérés, considérables, souvent présents et/ou à niveau modéré
- Problèmes importants, persistants, continus, handicapants au quotidien
- ND

9- Symptômes cognitifs

- Pas de problème
- Problèmes légers ou modérés, généralement modérés ou intermittents
- Problèmes modérés, considérables, souvent présents et/ou à niveau modéré
- Problèmes importants, persistants, continus, handicapants au quotidien
- ND

Score : ...../9

Nombre de symptômes associés (au cours de la semaine passée) : Réalisé/ Non Réalisé

|                                                          |                                                        |                                                       |
|----------------------------------------------------------|--------------------------------------------------------|-------------------------------------------------------|
| <input type="checkbox"/> Douleur musculaire              | <input type="checkbox"/> Syndrome intestin irritable   | <input type="checkbox"/> Fatigue                      |
| <input type="checkbox"/> Problème mémoire, concentration | <input type="checkbox"/> Céphalées                     | <input type="checkbox"/> Douleur/ crampes abdominales |
| <input type="checkbox"/> Faiblesse musculaire            | <input type="checkbox"/> Engourdissement/ picotement   | <input type="checkbox"/> Vertiges                     |
| <input type="checkbox"/> Insomnie                        | <input type="checkbox"/> Dépression                    | <input type="checkbox"/> Nervosité                    |
| <input type="checkbox"/> Constipation                    | <input type="checkbox"/> Douleur abdominale haute      | <input type="checkbox"/> Nausée                       |
| <input type="checkbox"/> Douleur thoracique              | <input type="checkbox"/> Diarrhée                      | <input type="checkbox"/> Bouche sèche                 |
| <input type="checkbox"/> Vision floue                    | <input type="checkbox"/> Fièvre                        | <input type="checkbox"/> Démangeaisons                |
| <input type="checkbox"/> Sifflement respiratoire         | <input type="checkbox"/> Syndrome de Raynaud           | <input type="checkbox"/> Urticaire                    |
| <input type="checkbox"/> Acouphènes                      | <input type="checkbox"/> Vomissements                  | <input type="checkbox"/> Brûlure thoracique           |
| <input type="checkbox"/> Aphtes buccaux                  | <input type="checkbox"/> Perte ou modification du goût | <input type="checkbox"/> Crise d'épilepsie            |
| <input type="checkbox"/> Yeux secs                       | <input type="checkbox"/> Oppression respiratoire       | <input type="checkbox"/> Perte d'appétit              |
| <input type="checkbox"/> Eruption cutanée                | <input type="checkbox"/> Hypersensibilité au soleil    | <input type="checkbox"/> Troubles de l'audition       |
| <input type="checkbox"/> Ecchymoses faciles              | <input type="checkbox"/> Perte de cheveux              | <input type="checkbox"/> Mictions fréquentes          |

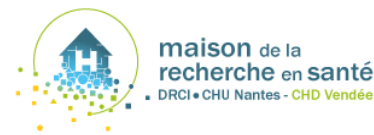

Douleurs à la miction

Spasmes de la vessie

Score : ...../3

Score total : ...../12

### QUESTIONNAIRE DE TAMPA : Réalisé/ Non réalisé

35- J'ai peur de me blesser si je fais de l'activité physique :

- Fortement en désaccord
- Quelque peu en désaccord
- Quelque peu en accord
- Fortement en accord
- ND

36- Ma douleur ne ferait qu'intensifier si j'essayais de la vaincre :

- Fortement en désaccord
- Quelque peu en désaccord
- Quelque peu en accord
- Fortement en accord
- ND

37- Mon corps me dit que quelque chose ne va vraiment pas :

- Fortement en désaccord
- Quelque peu en désaccord
- Quelque peu en accord
- Fortement en accord
- ND

38- Si je faisais de l'activité physique, ma douleur serait probablement soulagée:

- Fortement en désaccord
- Quelque peu en désaccord
- Quelque peu en accord
- Fortement en accord
- ND

39- Les gens ne prennent pas mon état de santé au sérieux :

- Fortement en désaccord
- Quelque peu en désaccord
- Quelque peu en accord
- Fortement en accord
- ND

40- Mon accident a mis mon corps en danger pour le reste de mes jours :

- Fortement en désaccord
- Quelque peu en désaccord
- Quelque peu en accord
- Fortement en accord
- ND





41- La douleur signifie toujours que je me suis blessé(e) :

- Fortement en désaccord
- Quelque peu en désaccord
- Quelque peu en accord
- Fortement en accord
- ND

42- Même si quelque chose aggrave ma douleur, cela ne veut pas dire que c'est dangereux :

- Fortement en désaccord
- Quelque peu en désaccord
- Quelque peu en accord
- Fortement en accord
- ND

43- J'ai peur de me blesser accidentellement :

- Fortement en désaccord
- Quelque peu en désaccord
- Quelque peu en accord
- Fortement en accord
- ND

44- La meilleure façon d'empêcher que ma douleur s'aggrave est de m'assurer de ne pas faire des mouvements inutiles :

- Fortement en désaccord
- Quelque peu en désaccord
- Quelque peu en accord
- Fortement en accord
- ND

45- Je n'aurais pas tant que douleurs s'il ne se passait pas quelque chose de grave dans mon corps :

- Fortement en désaccord
- Quelque peu en désaccord
- Quelque peu en accord
- Fortement en accord
- ND

46- Bien que ma condition soit pénible, je serais mieux si j'étais physiquement actif(ve) :

- Fortement en désaccord
- Quelque peu en désaccord
- Quelque peu en accord
- Fortement en accord
- ND

47- La douleur m'indique quand arrêter de faire des activités physiques pour que je ne me blesse pas :

- Fortement en désaccord
- Quelque peu en désaccord
- Quelque peu en accord
- Fortement en accord
- ND

48- Il n'est pas prudent qu'une personne avec un état de santé comme le mien soit physiquement active :

- Fortement en désaccord
- Quelque peu en désaccord
- Quelque peu en accord
- Fortement en accord
- ND

49- Je ne peux pas faire tout ce qu'une personne normale peut faire parce que j'ai plus de risque de me blesser :

- Fortement en désaccord
- Quelque peu en désaccord
- Quelque peu en accord
- Fortement en accord
- ND

50- Bien qu'il y ait quelque chose qui me cause beaucoup de douleurs, je ne pense pas que ce soit vraiment grave :

- Fortement en désaccord
- Quelque peu en désaccord
- Quelque peu en accord
- Fortement en accord
- ND

51- Personne ne devrait être obligé de faire des exercices lorsqu'il (elle) ressent de la douleur :

- Fortement en désaccord
- Quelque peu en désaccord
- Quelque peu en accord
- Fortement en accord
- ND

Score : ...../68

### EQ-5D-5L : Réalisé/ Non Réalisé

#### 3- Mobilité

- Je n'ai aucun problème pour me déplacer à pied
- J'ai des problèmes légers pour me déplacer à pied
- J'ai des problèmes modérés pour me déplacer à pied
- J'ai des problèmes sévères pour me déplacer à pied
- Je suis incapable de me déplacer à pied
- ND

#### 2 – Autonomie de la personne

- Je n'ai aucun problème pour me laver ou m'habiller tout(e) seul(e)
- J'ai des problèmes légers pour me laver ou m'habiller tout(e) seul(e)
- J'ai des problèmes modérés pour me laver ou m'habiller tout(e) seul(e)
- J'ai des problèmes sévères pour me laver ou m'habiller tout(e) seul(e)
- Je suis incapable de me laver ou de m'habiller tout(e) seul(e)
- ND

#### 3 – Activités courantes



- Je n'ai aucun problème pour accomplir mes activités courantes
- J'ai des problèmes légers pour accomplir mes activités courantes
- J'ai des problèmes modérés pour accomplir mes activités courantes
- J'ai des problèmes sévères pour accomplir mes activités courantes
- Je suis incapable d'accomplir mes activités courantes
- ND

4 – Douleurs/ inconfort

- Je n'ai ni douleur, ni inconfort
- J'ai des douleurs ou un inconfort léger(ères)
- J'ai des douleurs ou un inconfort modéré(es)
- J'ai des douleurs ou un inconfort sévère(s)
- J'ai des douleurs ou un inconfort extrême(s)
- ND

5 – Anxiété/ dépression

- Je ne suis ni anxieux(se), ni déprimé(e)
- Je suis légèrement anxieux(se) ou déprimé(e)
- Je suis modérément anxieux(se) ou déprimé(e)
- Je suis sévèrement anxieux(se) ou déprimé(e)
- Je suis extrêmement anxieux(se) ou déprimé(e)
- ND

### IMPEDANCEMETRIE

Masse totale du patient : |\_|\_|\_|,|\_| kg  
Masse grasse du patient : |\_|\_|\_|,|\_| kg  
Pourcentage en termes de masse graisseuse: |\_|\_| %

### ACTIVITE PHYSIQUE

Continuité de l'activité physique après M6: Oui/ Non/ ND

## TRAITEMENTS

**Le patient prend-il des traitements (*traitement de fond et traitement « si besoin »*)? : Oui / Non**  
Si oui, merci de bien vouloir compléter le tableau des traitements

| DCI              | Dose journalière | Unité                  |
|------------------|------------------|------------------------|
| ALMOTRIPTAN      |                  | mg                     |
| ALPRAZOLAM       |                  | mg                     |
| AMITRIPTYLINE    |                  | mg                     |
| ASPIRINE         |                  | g                      |
| ATENOLOL         |                  | mg                     |
| BACLOFENE        |                  | mg                     |
| BROMAZEPAM       |                  | mg                     |
| BUPRENORPHINE    |                  | mg                     |
| BUSPIRONE        |                  | mg                     |
| CANDESARTAN      |                  | mg                     |
| CAPASAICINE      |                  | patchs par application |
| CARBAMAZEPINE    |                  | mg                     |
| CELECOXIB        |                  | mg                     |
| CITALOPRAM       |                  | mg                     |
| CLOBAZAM         |                  | mg                     |
| CLOMIPRAMINE     |                  | mg                     |
| CLONIDINE        |                  | mg                     |
| CLORAZEPATE      |                  | mg                     |
| CLOTIAZEPAM      |                  | mg                     |
| CODEINE          |                  | mg                     |
| DEXAMETHASONE    |                  | mg                     |
| DIAZEPAM         |                  | mg                     |
| DICLOFENAC       |                  | mg                     |
| DIHYDROCODEINE   |                  | mg                     |
| DRONABINOL       |                  | mg                     |
| DULOXETINE       |                  | mg                     |
| ELETRIPTAN       |                  | mg                     |
| ESCITALOPRAM     |                  | mg                     |
| ETORICOXIB       |                  | mg                     |
| FENTANYL         |                  | µg                     |
| FENTANYL CITRATE |                  | µg                     |
| FLUOXETINE       |                  | mg                     |
| FROVATRIPTAN     |                  | mg                     |
| GABAPENTINE      |                  | mg                     |
| HALOPERIDOL      |                  | mg                     |
| HYDROMORPHONE    |                  | mg                     |
| IBUPROFENE       |                  | mg                     |
| INDOMETACINE     |                  | mg                     |
| KETOPROFENE      |                  | mg                     |

|                    |  |                        |
|--------------------|--|------------------------|
| LAMOTRIGINE        |  | mg                     |
| LIDOCAINE          |  | patchs par application |
| LISINOPRIL         |  | mg                     |
| LOFLAZEPATE        |  | mg                     |
| LOPRAZOLAM         |  | mg                     |
| LORAZEPAN          |  | mg                     |
| LORMETAZEPAM       |  | mg                     |
| LOXAPINE           |  | mg                     |
| METHADONE          |  | mg                     |
| METHYLPREDNISOLONE |  | mg                     |
| METOPROLOL         |  | mg                     |
| MIANSERINE         |  | mg                     |
| MILNACIPRAN        |  | mg                     |
| MIRTAZAPINE        |  | mg                     |
| MORPHINE           |  | mg                     |
| NADOLOL            |  | mg                     |
| NAPROXENE          |  | mg                     |
| NARATRIPTAN        |  | mg                     |
| NEBIVOLOL          |  | mg                     |
| NEFOPAM            |  | mg                     |
| NORDAZEPAM         |  | mg                     |
| OLANZAPINE         |  | mg                     |
| OPIUM              |  | mg                     |
| OXAZEPAM           |  | mg                     |
| OXCARBAZEPINE      |  | mg                     |
| OXYCODONE          |  | mg                     |
| PARACETAMOL        |  | g                      |
| PAROXETINE         |  | mg                     |
| PHENOBARBITAL      |  | mg                     |
| PHLOROGLUCINOL     |  | mg                     |
| PIROXICAM          |  | mg                     |
| PRAZEPAM           |  | mg                     |
| PREDNISOLONE       |  | mg                     |
| PREDNISONNE        |  | mg                     |
| PREGABALINE        |  | mg                     |
| PROPRANOLOL        |  | mg                     |
| RISPERIDONE        |  | mg                     |
| RIZATRIPTAN        |  | mg                     |
| SUMATRIPTAN        |  | mg                     |
| THIOLCHICOSIDE     |  | mg                     |
| TIMOLOL            |  | mg                     |
| TOPIRAMATE         |  | mg                     |
| TRAMADOL           |  | mg                     |
| TRIMEBUTINE        |  | mg                     |
| VALPROATE          |  | mg                     |
| VENLAFAXINE        |  | mg                     |
| ZOLMITRIPTAN       |  | mg                     |

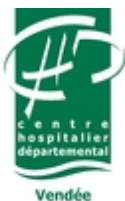

« Fibromyalgie et activité physique spécifique »

FibrAPSpé – Thomas Rulleau



|           |  |    |
|-----------|--|----|
| ZOLPIDEM  |  | mg |
| ZOPICLONE |  | mg |

### Patchs QUTENZA

Le patient a-t-il pris du QUTENZA SUR LES 3 MOIS PRECEDENTS LA VISITE? : Oui / Non

Si oui, |\_\_|\_\_| patches par application

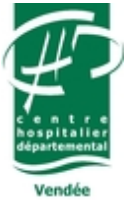

« Fibromyalgie et activité physique spécifique »

FibrAPSpé – Thomas Rulleau

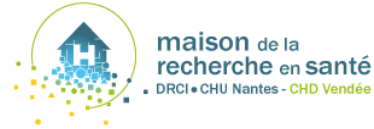

### FREQUENCE CARDIAQUE MAXIMALE THEORIQUE

Durée dans chaque intervalle de la fréquence cardiaque théorique :

| <b>Durées</b><br><b>Semaines</b> | Entre 50 et 60%<br>de la FCM | Durée<br>entre 60 et 70%<br>de la FCM | Durée<br>entre 70 et 80%<br>de la FCM | Durée<br>entre 80 et 90%<br>de la FCM | Nombre<br>de séances |
|----------------------------------|------------------------------|---------------------------------------|---------------------------------------|---------------------------------------|----------------------|
| S1                               |                              |                                       |                                       |                                       |                      |
| S2                               |                              |                                       |                                       |                                       |                      |
| S3                               |                              |                                       |                                       |                                       |                      |
| S4                               |                              |                                       |                                       |                                       |                      |
| S5                               |                              |                                       |                                       |                                       |                      |
| S6                               |                              |                                       |                                       |                                       |                      |
| S7                               |                              |                                       |                                       |                                       |                      |
| S8                               |                              |                                       |                                       |                                       |                      |
| S9                               |                              |                                       |                                       |                                       |                      |
| S10                              |                              |                                       |                                       |                                       |                      |
| S11                              |                              |                                       |                                       |                                       |                      |
| S12                              |                              |                                       |                                       |                                       |                      |
| S13                              |                              |                                       |                                       |                                       |                      |
| S14                              |                              |                                       |                                       |                                       |                      |
| S15                              |                              |                                       |                                       |                                       |                      |

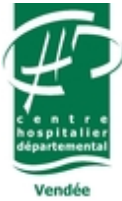

« Fibromyalgie et activité physique spécifique »

FibrAPSpé – Thomas Rulleau



| EVENEMENTS INDESIRABLES (Evi) (cf. El d'intérêts listés dans le protocole) : Oui/ Non |                       |                       |               |                    |
|---------------------------------------------------------------------------------------|-----------------------|-----------------------|---------------|--------------------|
| N°                                                                                    | Nature de l'évènement | Catégorie d'évènement | Date de début | Date de résolution |
| 1                                                                                     | _____                 |                       | ___/___/_____ | ___/___/_____      |
| 2                                                                                     | _____                 |                       | ___/___/_____ | ___/___/_____      |
| 3                                                                                     | _____                 |                       | ___/___/_____ | ___/___/_____      |
| 4                                                                                     | _____                 |                       | ___/___/_____ | ___/___/_____      |

Signalement d'un début de grossesse : Oui/ Non

Si oui, date de début de grossesse: \_\_\_/\_\_\_/\_\_\_\_\_

\*Catégorie d'évènement : 1= Troubles fonctionnels consécutifs aux séances empêchant la réalisation/ poursuite d'une activité physique ;  
2= Dysfonctionnement du système de tracking d'activité ; 3= Faits nouveaux



## STATUT DU PATIENT EN FIN D'ETUDE

La date du dernier jour de participation à l'étude correspond-elle à la date finale théorique de fin d'étude :  
Oui/ Non

Date du dernier jour de participation à l'étude: |\_|\_| / |\_|\_| / |\_|\_|\_|\_|

En cas de sortie prématurée d'étude, préciser la raison:

- Retrait de consentement<sup>(1)</sup>
- Perdu de vue
- Décès<sup>(2)</sup>
- Déviation au protocole empêchant la poursuite de l'étude<sup>(3)</sup>

<sup>(1)</sup> *En cas de retrait de consentement, compléter la section « Retrait de consentement ».*

<sup>(2)</sup> *En cas de décès, compléter la section « Décès ».*

<sup>(3)</sup> *En cas de déviation au protocole, compléter le tableau des déviations.*

## RETRAIT DE CONSENTEMENT

Si retrait de consentement,

- Date du retrait de consentement : |\_|\_| / |\_|\_| / |\_|\_|\_|\_|
- Le patient s'oppose-t-il à l'analyse de ses données? Oui/ Non





## DECES

Si décès du patient,

- Date de décès : |\_|\_| / |\_|\_| / |\_|\_|\_|\_|
- Cause du décès : \_\_\_\_\_

Je soussigné, Pr/Dr .....,  
Investigateur, certifie exactes les données recueillies dans ce cahier d'observation et les corrections  
faites conformément aux données du dossier médical.

Date : |\_|\_| / |\_|\_| / |\_|\_|\_|\_|

Signature :
